# Supplementary material
Source: PubMed Central journal article supplement (PMC7861500)
Supplement: str-52-664-s001.pdf [file str-52-664-s001.pdf]

# SUPPLEMENTARY MATERIAL

## Contents

|                                                                                                                                 |    |
|---------------------------------------------------------------------------------------------------------------------------------|----|
| Appendix I Model parameters and distributions .....                                                                             | 2  |
| Table I.1 Distribution of mRS score at 90 days following the event, data source: meta-analysis <sup>21</sup> ...                | 2  |
| Table I.2 Subsequent mortality risk according to mRS score at 90 days, data source: OxVasc <sup>27</sup> .....                  | 3  |
| Table I.3 Equations predicting health utilities at baseline, 90 days, 1 to 5 years, data source:<br>OxVasc <sup>27</sup> .....  | 3  |
| Table I.4 Equations predicting health and social care use at 90 days, 1 to 5 years, data source:<br>OxVasc <sup>27</sup> .....  | 5  |
| Appendix II Heterogeneity of key model parameters .....                                                                         | 13 |
| Appendix III Treatment resource use, data source: cost-effectiveness studies <sup>18,20</sup> .....                             | 14 |
| Appendix IV Treatment costs in 2017 \$: devices, consumables and staff .....                                                    | 15 |
| Appendix V Health and social resource use country weights, data source: a cross-national panel data<br>base <sup>30</sup> ..... | 16 |
| Table V.1 0-90 days health care resource use country-specific weights .....                                                     | 16 |
| Table V.2 1-5 years health care resource use country-specific weights.....                                                      | 17 |
| Appendix VI Total 5-year costs after MT and standard care in 2017 \$ million.....                                               | 18 |
| Appendix VII One-way sensitivity analyses.....                                                                                  | 20 |

## APPENDIX I MODEL PARAMETERS AND DISTRIBUTIONS

Table I.1 Distribution of mRS score at 90 days following the event, data source: meta-analysis<sup>21</sup>

| Description                 | Parameter | Uncertainty  |             | Distribution |
|-----------------------------|-----------|--------------|-------------|--------------|
| <b>Intervention arm</b>     |           |              |             |              |
| <b>MT+IVT 3-month mRS 0</b> | 0.099     | Alpha 51.98  | Beta 473.02 | Dirichlet    |
| <b>MT+IVT 3-month mRS 1</b> | 0.171     | Alpha 89.78  | Beta 435.23 | Dirichlet    |
| <b>MT+IVT 3-month mRS 2</b> | 0.194     | Alpha 101.85 | Beta 423.15 | Dirichlet    |
| <b>MT+IVT 3-month mRS 3</b> | 0.166     | Alpha 87.15  | Beta 473.85 | Dirichlet    |
| <b>MT+IVT 3-month mRS 4</b> | 0.173     | Alpha 90.83  | Beta 434.18 | Dirichlet    |
| <b>MT+IVT 3-month mRS 5</b> | 0.059     | Alpha 30.98  | Beta 494.03 | Dirichlet    |
| <b>MT+IVT 3-month mRS 6</b> | 0.138     | Alpha 72.45  | Beta 452.55 | Dirichlet    |
| <b>MT 3-month mRS 0</b>     | 0.102     | Alpha 11.02  | Beta 96.98  | Dirichlet    |
| <b>MT 3-month mRS 1</b>     | 0.157     | Alpha 16.96  | Beta 91.04  | Dirichlet    |
| <b>MT 3-month mRS 2</b>     | 0.176     | Alpha 19.01  | Beta 88.99  | Dirichlet    |
| <b>MT 3-month mRS 3</b>     | 0.185     | Alpha 19.98  | Beta 88.02  | Dirichlet    |
| <b>MT 3-month mRS 4</b>     | 0.074     | Alpha 7.99   | Beta 100.01 | Dirichlet    |
| <b>MT 3-month mRS 5</b>     | 0.074     | Alpha 7.99   | Beta 100.01 | Dirichlet    |
| <b>MT 3-month mRS 6</b>     | 0.232     | Alpha 25.06  | Beta 82.94  | Dirichlet    |
| <b>Control arm</b>          |           |              |             |              |
| <b>IVT 3-month mRS 0</b>    | 0.051     | Alpha 28.82  | Beta 536.18 | Dirichlet    |
| <b>IVT 3-month mRS 1</b>    | 0.081     | Alpha 45.77  | Beta 519.24 | Dirichlet    |
| <b>IVT 3-month mRS 2</b>    | 0.138     | Alpha 77.97  | Beta 487.03 | Dirichlet    |
| <b>IVT 3-month mRS 3</b>    | 0.175     | Alpha 98.88  | Beta 466.13 | Dirichlet    |
| <b>IVT 3-month mRS 4</b>    | 0.237     | Alpha 133.91 | Beta 431.10 | Dirichlet    |
| <b>IVT 3-month mRS 5</b>    | 0.133     | Alpha 75.15  | Beta 489.86 | Dirichlet    |
| <b>IVT 3-month mRS 6</b>    | 0.185     | Alpha 104.53 | Beta 460.47 | Dirichlet    |
| <b>no IVT 3-month mRS 0</b> | 0.036     | Alpha 2.88   | Beta 77.12  | Dirichlet    |
| <b>no IVT 3-month mRS 1</b> | 0.062     | Alpha 4.96   | Beta 75.04  | Dirichlet    |
| <b>no IVT 3-month mRS 2</b> | 0.125     | Alpha 10.00  | Beta 70.00  | Dirichlet    |
| <b>no IVT 3-month mRS 3</b> | 0.087     | Alpha 6.96   | Beta 73.04  | Dirichlet    |
| <b>no IVT 3-month mRS 4</b> | 0.312     | Alpha 24.96  | Beta 55.04  | Dirichlet    |
| <b>no IVT 3-month mRS 5</b> | 0.15      | Alpha 12.00  | Beta 68.00  | Dirichlet    |
| <b>no IVT 3-month mRS 6</b> | 0.228     | Alpha 18.24  | Beta 61.76  | Dirichlet    |

**Table I.2 Subsequent mortality risk according to mRS score at 90 days, data source:**

**OxVasc<sup>27</sup>**

| <b>mRS 0-3 at 90 days</b> | <b>Coefficient</b> | <b>Standard error</b> | <b>Distribution</b> |
|---------------------------|--------------------|-----------------------|---------------------|
| age1                      | 0.06467            | 0.00757               | Bootstrap           |
| age2                      | 0.05083            | 0.01434               | Bootstrap           |
| female                    | -0.11766           | 0.09292               | Bootstrap           |
| 1                         | 0.25940            | 0.20662               | Bootstrap           |
| 2                         | 0.64727            | 0.20501               | Bootstrap           |
| 3                         | 1.16960            | 0.02045               | Bootstrap           |
| cons                      | -12.38158          | 0.59279               | Bootstrap           |
| gamma                     | 0.05953            | 0.00320               | Bootstrap           |
| <b>mRS 4 at 90 days</b>   | <b>Coefficient</b> | <b>Standard error</b> | <b>Distribution</b> |
| age1                      | 0.08382            | 0.01949               | Bootstrap           |
| age2                      | 0.04636            | 0.01981               | Bootstrap           |
| female                    | -0.19714           | 0.18359               | Bootstrap           |
| cons                      | -11.08911          | 1.47799               | Bootstrap           |
| gamma                     | 0.02522            | 0.00493               | Bootstrap           |
| <b>mRS 5 at 90 days</b>   | <b>Coefficient</b> | <b>Standard error</b> | <b>Distribution</b> |
| age1                      | 0.05182            | 0.02760               | Bootstrap           |
| age2                      | 0.12207            | 0.03009               | Bootstrap           |
| female                    | -0.71592           | 0.27862               | Bootstrap           |
| cons                      | -7.37280           | 2.03774               | Bootstrap           |
| gamma                     | -0.00285           | 0.00686               | Bootstrap           |

**Table I.3 Equations predicting health utilities at baseline, 90 days, 1 to 5 years, data**

**source: OxVasc<sup>27</sup>**

| <b>Variable</b>    | <b>Coefficient</b> | <b>Standard error</b> | <b>Distribution</b> |
|--------------------|--------------------|-----------------------|---------------------|
| <b>At baseline</b> |                    |                       |                     |
| 1.disability0      | -0.22651           | 0.02930               | Bootstrap           |
| age                | -0.00539           | 0.00059               | Bootstrap           |
| gender             | 0.03291            | 0.02639               | Bootstrap           |
| cons               | 0.95359            | 0.04732               | Bootstrap           |
| <b>At 90 days</b>  |                    |                       |                     |
| mRS 0 intercept    | 0.80300            | 0.05240               | Bootstrap           |
| mRS 1              | -0.06610           | 0.02380               | Bootstrap           |
| mRS 2              | -0.17000           | 0.02510               | Bootstrap           |
| mRS 3              | -0.33200           | 0.02760               | Bootstrap           |

| <b>Variable</b>   | <b>Coefficient</b> | <b>Standard error</b> | <b>Distribution</b>            |
|-------------------|--------------------|-----------------------|--------------------------------|
| mRS 4             | -0.62100           | 0.03510               | Bootstrap                      |
| mRS 5             | -0.92100           | 0.04510               | Bootstrap                      |
| age               | 0.00072            | 0.00058               | Bootstrap                      |
| male              | 0.03710            | 0.01430               | Bootstrap                      |
| <b>At 1 year</b>  |                    |                       |                                |
| mRS 0 intercept   | 0.88300            | 0.05980               | Bootstrap                      |
| mRS 1             | -0.06830           | 0.02640               | Bootstrap                      |
| mRS 2             | -0.14800           | 0.02790               | Bootstrap                      |
| mRS 3             | -0.29800           | 0.03070               | Bootstrap                      |
| mRS 4             | -0.42700           | 0.03950               | Bootstrap                      |
| mRS 5             | -0.83000           | 0.06610               | Bootstrap                      |
| age               | -0.00111           | 0.00068               | Bootstrap                      |
| male              | 0.05190            | 0.01630               | Bootstrap                      |
| <b>At 2 years</b> |                    |                       |                                |
| mRS 0 intercept   | 0.96000            | 0.07280               | Bootstrap                      |
| mRS 1             | -0.06340           | 0.03150               | Bootstrap                      |
| mRS 2             | -0.11200           | 0.03370               | Bootstrap                      |
| mRS 3             | -0.27300           | 0.03810               | Bootstrap                      |
| mRS 4             | -0.38900           | 0.04960               | Bootstrap                      |
| mRS 5             | -0.82300           | 0.10300               | Bootstrap                      |
| age               | -0.00283           | 0.00085               | Bootstrap                      |
| male              | 0.04740            | 0.01990               | Bootstrap                      |
| <b>At 3 years</b> |                    |                       |                                |
| mRS 0 intercept   | 0.96733            | 0.07653               | Gamma (modelled as disutility) |
| mRS 1             | -0.06347           | 0.03267               | Gamma (modelled as disutility) |
| mRS 2             | -0.12067           | 0.03500               | Gamma (modelled as disutility) |
| mRS 3             | -0.28233           | 0.04047               | Gamma (modelled as disutility) |
| mRS 4             | -0.38433           | 0.05280               | Gamma (modelled as disutility) |
| mRS 5             | -0.82233           | 0.11000               | Gamma (modelled as disutility) |
| age               | -0.00303           | 0.00090               | Gamma (modelled as disutility) |
| male              | 0.05037            | 0.02100               | Gamma (modelled as disutility) |
| <b>At 4 years</b> |                    |                       |                                |
| mRS 0 intercept   | 0.97467            | 0.08027               | Gamma (modelled as disutility) |
| mRS 1             | -0.06353           | 0.03383               | Gamma (modelled as disutility) |
| mRS 2             | -0.12933           | 0.03630               | Gamma (modelled as disutility) |
| mRS 3             | -0.29167           | 0.04283               | Gamma (modelled as disutility) |
| mRS 4             | -0.37967           | 0.05600               | Gamma (modelled as disutility) |
| mRS 5             | -0.82167           | 0.11700               | Gamma (modelled as disutility) |
| age               | -0.00324           | 0.00094               | Gamma (modelled as disutility) |
| male              | 0.05333            | 0.02210               | Gamma (modelled as disutility) |

| Variable          | Coefficient | Standard error | Distribution |
|-------------------|-------------|----------------|--------------|
| <b>At 5 years</b> |             |                |              |
| mRS 0 intercept   | 0.98200     | 0.08400        | Bootstrap    |
| mRS 1             | -0.06360    | 0.03500        | Bootstrap    |
| mRS 2             | -0.13800    | 0.03760        | Bootstrap    |
| mRS 3             | -0.30100    | 0.04520        | Bootstrap    |
| mRS 4             | -0.37500    | 0.05920        | Bootstrap    |
| mRS 5             | -0.82100    | 0.12400        | Bootstrap    |
| age               | -0.00344    | 0.00099        | Bootstrap    |
| male              | 0.05630     | 0.02320        | Bootstrap    |

**Table I.4 Equations predicting health and social care use at 90 days, 1 to 5 years, data**

source: OxVasc<sup>27</sup>

| Variable                         | Coefficient | Standard error | Distribution |
|----------------------------------|-------------|----------------|--------------|
| <b>Length of stay at 90 days</b> |             |                |              |
| mRS 0 intercept                  | 1.288       | 3.87           | Bootstrap    |
| mRS 1                            | 0.977       | 1.83           | Bootstrap    |
| mRS 2                            | 3.94        | 1.93           | Bootstrap    |
| mRS 3                            | 17.43       | 2.07           | Bootstrap    |
| mRS 4                            | 48.87       | 2.37           | Bootstrap    |
| mRS 5                            | 62.02       | 2.75           | Bootstrap    |
| age                              | 0.00566     | 0.04           | Bootstrap    |
| male                             | -0.513      | 1.02           | Bootstrap    |
| <b>Length of stay at 1 year</b>  |             |                |              |
| mRS 0 intercept                  | 10.27       | 5.78           | Bootstrap    |
| mRS 1                            | 0.651       | 2.74           | Bootstrap    |
| mRS 2                            | 3.403       | 2.89           | Bootstrap    |
| mRS 3                            | 13.49       | 3.10           | Bootstrap    |
| mRS 4                            | 34.70       | 3.54           | Bootstrap    |
| mRS 5                            | 50.36       | 4.11           | Bootstrap    |
| age                              | -0.11       | 0.06           | Bootstrap    |
| male                             | -1.133      | 1.52           | Bootstrap    |
| <b>Length of stay at 2 years</b> |             |                |              |
| mRS 0 intercept                  | -7.04       | 3.86           | Bootstrap    |
| mRS 1                            | 0.166       | 1.77           | Bootstrap    |
| mRS 2                            | 1.473       | 1.87           | Bootstrap    |
| mRS 3                            | 5.29        | 2.04           | Bootstrap    |

| <b>Variable</b>                  | <b>Coefficient</b> | <b>Standard error</b> | <b>Distribution</b> |
|----------------------------------|--------------------|-----------------------|---------------------|
| mRS 4                            | 2.700              | 2.42                  | Bootstrap           |
| mRS 5                            | 1.992              | 3.04                  | Bootstrap           |
| age                              | 0.14               | 0.04                  | Bootstrap           |
| male                             | 0.195              | 1.03                  | Bootstrap           |
| <b>Length of stay at 3 years</b> |                    |                       |                     |
| mRS 0 intercept                  | -8.08              | 4.49                  | Bootstrap           |
| mRS 1                            | 0.321              | 2.04                  | Bootstrap           |
| mRS 2                            | 2.427              | 2.16                  | Bootstrap           |
| mRS 3                            | 9.00               | 2.41                  | Bootstrap           |
| mRS 4                            | 4.87               | 2.82                  | Bootstrap           |
| mRS 5                            | 1.494              | 3.71                  | Bootstrap           |
| age                              | 0.14               | 0.05                  | Bootstrap           |
| male                             | 0.696              | 1.22                  | Bootstrap           |
| <b>Length of stay at 3 years</b> |                    |                       |                     |
| mRS 0 intercept                  | 1.288              | 3.87                  | Bootstrap           |
| mRS 1                            | 0.977              | 1.83                  | Bootstrap           |
| mRS 2                            | 3.94               | 1.93                  | Bootstrap           |
| mRS 3                            | 17.43              | 2.07                  | Bootstrap           |
| mRS 4                            | 48.87              | 2.37                  | Bootstrap           |
| mRS 5                            | 62.02              | 2.75                  | Bootstrap           |
| age                              | 0.00566            | 0.04                  | Bootstrap           |
| male                             | -0.513             | 1.02                  | Bootstrap           |
| <b>Length of stay at 4 years</b> |                    |                       |                     |
| mRS 0 intercept                  | -5.794             | 3.64                  | Bootstrap           |
| mRS 1                            | 1.141              | 1.65                  | Bootstrap           |
| mRS 2                            | 3.93               | 1.75                  | Bootstrap           |
| mRS 3                            | 7.68               | 1.97                  | Bootstrap           |
| mRS 4                            | 5.46               | 2.32                  | Bootstrap           |
| mRS 5                            | 0.711              | 3.08                  | Bootstrap           |
| age                              | 0.15               | 0.04                  | Bootstrap           |
| male                             | -1.80              | 0.99                  | Bootstrap           |
| <b>Length of stay at 5 years</b> |                    |                       |                     |
| mRS 0 intercept                  | -0.175             | 4.51                  | Bootstrap           |
| mRS 1                            | 1.463              | 2.02                  | Bootstrap           |
| mRS 2                            | 1.755              | 2.14                  | Bootstrap           |
| mRS 3                            | 7.95               | 2.45                  | Bootstrap           |
| mRS 4                            | 4.87               | 2.89                  | Bootstrap           |
| mRS 5                            | 0.0104             | 4.05                  | Bootstrap           |
| age                              | 0.09               | 0.05                  | Bootstrap           |
| male                             | -2.12              | 1.21                  | Bootstrap           |

| Variable                    | Coefficient | Standard error | Distribution |
|-----------------------------|-------------|----------------|--------------|
| <b>Day cases at 90 days</b> |             |                |              |
| mRS 0 intercept             | 0.265       | 0.24           | Bootstrap    |
| mRS 1                       | 0.0618      | 0.12           | Bootstrap    |
| mRS 2                       | 0.0410      | 0.12           | Bootstrap    |
| mRS 3                       | 0.0287      | 0.13           | Bootstrap    |
| mRS 4                       | 0.112       | 0.15           | Bootstrap    |
| mRS 5                       | -0.0804     | 0.17           | Bootstrap    |
| age                         | -0.00353    | 0.00           | Bootstrap    |
| male                        | 0.0908      | 0.06           | Bootstrap    |
| <b>Day cases at 1 year</b>  |             |                |              |
| mRS 0 intercept             | -0.287      | 0.67           | Bootstrap    |
| mRS 1                       | 0.140       | 0.32           | Bootstrap    |
| mRS 2                       | -0.00288    | 0.34           | Bootstrap    |
| mRS 3                       | 0.252       | 0.36           | Bootstrap    |
| mRS 4                       | 0.325       | 0.41           | Bootstrap    |
| mRS 5                       | -0.242      | 0.48           | Bootstrap    |
| age                         | 0.00132     | 0.01           | Bootstrap    |
| male                        | 0.279       | 0.18           | Bootstrap    |
| <b>Day cases at 2 years</b> |             |                |              |
| mRS 0 intercept             | -0.757      | 0.69           | Bootstrap    |
| mRS 1                       | 0.278       | 0.32           | Bootstrap    |
| mRS 2                       | 0.0230      | 0.34           | Bootstrap    |
| mRS 3                       | -0.0906     | 0.37           | Bootstrap    |
| mRS 4                       | 0.0721      | 0.43           | Bootstrap    |
| mRS 5                       | -0.0291     | 0.55           | Bootstrap    |
| age                         | 0.0105      | 0.01           | Bootstrap    |
| male                        | 0.248       | 0.19           | Bootstrap    |
| <b>Day cases at 3 years</b> |             |                |              |
| mRS 0 intercept             | -1.296      | 0.79           | Bootstrap    |
| mRS 1                       | 0.510       | 0.36           | Bootstrap    |
| mRS 2                       | 0.0612      | 0.38           | Bootstrap    |
| mRS 3                       | -0.00762    | 0.43           | Bootstrap    |
| mRS 4                       | 0.249       | 0.50           | Bootstrap    |
| mRS 5                       | 0.0815      | 0.66           | Bootstrap    |
| age                         | 0.01        | 0.01           | Bootstrap    |
| male                        | 0.340       | 0.22           | Bootstrap    |
| <b>Day cases at 4 years</b> |             |                |              |
| mRS 0 intercept             | -0.878      | 0.79           | Bootstrap    |
| mRS 1                       | 0.133       | 0.36           | Bootstrap    |

| <b>Variable</b>                     | <b>Coefficient</b> | <b>Standard error</b> | <b>Distribution</b> |
|-------------------------------------|--------------------|-----------------------|---------------------|
| mRS 2                               | -0.154             | 0.38                  | Bootstrap           |
| mRS 3                               | -0.214             | 0.43                  | Bootstrap           |
| mRS 4                               | -0.145             | 0.50                  | Bootstrap           |
| mRS 5                               | -0.320             | 0.67                  | Bootstrap           |
| age                                 | 0.0120             | 0.01                  | Bootstrap           |
| male                                | 0.321              | 0.22                  | Bootstrap           |
| <b>Day cases at 5 years</b>         |                    |                       |                     |
| mRS 0 intercept                     | -0.151             | 0.27                  | Bootstrap           |
| mRS 1                               | -0.00737           | 0.12                  | Bootstrap           |
| mRS 2                               | -0.0889            | 0.13                  | Bootstrap           |
| mRS 3                               | -0.169             | 0.15                  | Bootstrap           |
| mRS 4                               | -0.100             | 0.17                  | Bootstrap           |
| mRS 5                               | -0.285             | 0.24                  | Bootstrap           |
| age                                 | 0.01               | 0.00                  | Bootstrap           |
| male                                | 0.0679             | 0.07                  | Bootstrap           |
| <b>Outpatient visits at 90 days</b> |                    |                       |                     |
| mRS 0 intercept                     | 4.70               | 0.41                  | Bootstrap           |
| mRS 1                               | -0.225             | 0.20                  | Bootstrap           |
| mRS 2                               | -0.219             | 0.21                  | Bootstrap           |
| mRS 3                               | -0.48              | 0.22                  | Bootstrap           |
| mRS 4                               | -1.46              | 0.25                  | Bootstrap           |
| mRS 5                               | -1.62              | 0.29                  | Bootstrap           |
| age                                 | -0.02              | 0.00                  | Bootstrap           |
| male                                | 0.126              | 0.11                  | Bootstrap           |
| <b>Outpatient visits at 1 year</b>  |                    |                       |                     |
| mRS 0 intercept                     | 3.85               | 0.88                  | Bootstrap           |
| mRS 1                               | 0.73               | 0.42                  | Bootstrap           |
| mRS 2                               | 1.46               | 0.44                  | Bootstrap           |
| mRS 3                               | 1.19               | 0.47                  | Bootstrap           |
| mRS 4                               | 2.30               | 0.54                  | Bootstrap           |
| mRS 5                               | 0.343              | 0.63                  | Bootstrap           |
| age                                 | -0.05              | 0.01                  | Bootstrap           |
| male                                | 0.87               | 0.23                  | Bootstrap           |
| <b>Outpatient visits at 2 years</b> |                    |                       |                     |
| mRS 0 intercept                     | 2.54               | 0.93                  | Bootstrap           |
| mRS 1                               | 0.76               | 0.43                  | Bootstrap           |
| mRS 2                               | 1.09               | 0.45                  | Bootstrap           |
| mRS 3                               | 0.619              | 0.49                  | Bootstrap           |



| <b>Variable</b>                     | <b>Coefficient</b> | <b>Standard error</b> | <b>Distribution</b> |
|-------------------------------------|--------------------|-----------------------|---------------------|
| mRS 4                               | 1.20               | 0.59                  | Bootstrap           |
| mRS 5                               | 0.171              | 0.74                  | Bootstrap           |
| age                                 | -0.02              | 0.01                  | Bootstrap           |
| male                                | 0.56               | 0.25                  | Bootstrap           |
| <b>Outpatient visits at 3 years</b> |                    |                       |                     |
| mRS 0 intercept                     | 1.369              | 0.87                  | Bootstrap           |
| mRS 1                               | 0.80               | 0.39                  | Bootstrap           |
| mRS 2                               | 1.13               | 0.42                  | Bootstrap           |
| mRS 3                               | 0.94               | 0.47                  | Bootstrap           |
| mRS 4                               | 0.99               | 0.55                  | Bootstrap           |
| mRS 5                               | 0.776              | 0.72                  | Bootstrap           |
| age                                 | -0.00763           | 0.01                  | Bootstrap           |
| male                                | 0.41               | 0.24                  | Bootstrap           |
| <b>Outpatient visits at 4 years</b> |                    |                       |                     |
| mRS 0 intercept                     | 2.54               | 0.99                  | Bootstrap           |
| mRS 1                               | 0.167              | 0.45                  | Bootstrap           |
| mRS 2                               | 0.568              | 0.47                  | Bootstrap           |
| mRS 3                               | 0.631              | 0.54                  | Bootstrap           |
| mRS 4                               | 0.294              | 0.63                  | Bootstrap           |
| mRS 5                               | -0.109             | 0.84                  | Bootstrap           |
| age                                 | -0.00988           | 0.01                  | Bootstrap           |
| male                                | 0.0603             | 0.27                  | Bootstrap           |
| <b>Outpatient visits at 5 years</b> |                    |                       |                     |
| mRS 0 intercept                     | 1.005              | 1.40                  | Bootstrap           |
| mRS 1                               | 0.663              | 0.63                  | Bootstrap           |
| mRS 2                               | 0.752              | 0.67                  | Bootstrap           |
| mRS 3                               | 1.28               | 0.76                  | Bootstrap           |
| mRS 4                               | 0.530              | 0.90                  | Bootstrap           |
| mRS 5                               | -0.0198            | 1.26                  | Bootstrap           |
| age                                 | 0.00252            | 0.02                  | Bootstrap           |
| male                                | 0.468              | 0.38                  | Bootstrap           |
| <b>A&amp;E visits 90 days</b>       |                    |                       |                     |
| mRS 0 intercept                     | 0.32               | 0.13                  | Bootstrap           |
| mRS 1                               | 0.00822            | 0.06                  | Bootstrap           |
| mRS 2                               | 0.11               | 0.06                  | Bootstrap           |
| mRS 3                               | 0.17               | 0.07                  | Bootstrap           |
| mRS 4                               | 0.35               | 0.08                  | Bootstrap           |
| mRS 5                               | 0.24               | 0.09                  | Bootstrap           |

| <b>Variable</b>               | <b>Coefficient</b> | <b>Standard error</b> | <b>Distribution</b> |
|-------------------------------|--------------------|-----------------------|---------------------|
| age                           | -0.000716          | 0.00                  | Bootstrap           |
| male                          | 0.0455             | 0.03                  | Bootstrap           |
| <b>A&amp;E visits 1 year</b>  |                    |                       |                     |
| mRS 0 intercept               | 0.29               | 0.14                  | Bootstrap           |
| mRS 1                         | -0.00551           | 0.07                  | Bootstrap           |
| mRS 2                         | 0.0655             | 0.07                  | Bootstrap           |
| mRS 3                         | 0.24               | 0.07                  | Bootstrap           |
| mRS 4                         | 0.0909             | 0.09                  | Bootstrap           |
| mRS 5                         | 0.0474             | 0.10                  | Bootstrap           |
| age                           | -0.00110           | 0.00                  | Bootstrap           |
| male                          | -0.0217            | 0.04                  | Bootstrap           |
| <b>A&amp;E visits 2 years</b> |                    |                       |                     |
| mRS 0 intercept               | -0.0771            | 0.14                  | Bootstrap           |
| mRS 1                         | -0.0232            | 0.06                  | Bootstrap           |
| mRS 2                         | 0.0381             | 0.07                  | Bootstrap           |
| mRS 3                         | 0.116              | 0.07                  | Bootstrap           |
| mRS 4                         | 0.0579             | 0.08                  | Bootstrap           |
| mRS 5                         | -0.00926           | 0.11                  | Bootstrap           |
| age                           | 0.00               | 0.00                  | Bootstrap           |
| male                          | -0.0346            | 0.04                  | Bootstrap           |
| <b>A&amp;E visits 3 years</b> |                    |                       |                     |
| mRS 0 intercept               | -0.142             | 0.17                  | Bootstrap           |
| mRS 1                         | -0.0239            | 0.08                  | Bootstrap           |
| mRS 2                         | 0.15               | 0.08                  | Bootstrap           |
| mRS 3                         | 0.34               | 0.09                  | Bootstrap           |
| mRS 4                         | 0.24               | 0.10                  | Bootstrap           |
| mRS 5                         | 0.104              | 0.14                  | Bootstrap           |
| age                           | 0.00               | 0.00                  | Bootstrap           |
| male                          | 0.0471             | 0.04                  | Bootstrap           |
| <b>A&amp;E visits 4 years</b> |                    |                       |                     |
| mRS 0 intercept               | -0.131             | 0.20                  | Bootstrap           |
| mRS 1                         | -0.0248            | 0.09                  | Bootstrap           |
| mRS 2                         | 0.0768             | 0.10                  | Bootstrap           |
| mRS 3                         | 0.41               | 0.11                  | Bootstrap           |
| mRS 4                         | 0.0903             | 0.13                  | Bootstrap           |
| mRS 5                         | 0.121              | 0.17                  | Bootstrap           |
| age                           | 0.00               | 0.00                  | Bootstrap           |
| male                          | 0.0751             | 0.05                  | Bootstrap           |
| <b>A&amp;E visits 5 years</b> |                    |                       |                     |

| <b>Variable</b>                     | <b>Coefficient</b> | <b>Standard error</b> | <b>Distribution</b> |
|-------------------------------------|--------------------|-----------------------|---------------------|
| mRS 0 intercept                     | 0.0131             | 0.20                  | Bootstrap           |
| mRS 1                               | 0.000845           | 0.09                  | Bootstrap           |
| mRS 2                               | 0.0227             | 0.10                  | Bootstrap           |
| mRS 3                               | 0.25               | 0.11                  | Bootstrap           |
| mRS 4                               | 0.0894             | 0.13                  | Bootstrap           |
| mRS 5                               | 0.00156            | 0.18                  | Bootstrap           |
| age                                 | 0.00299            | 0.00                  | Bootstrap           |
| male                                | 0.00318            | 0.05                  | Bootstrap           |
| <b>Nursing home days at 90 days</b> |                    |                       |                     |
| mRS 0 intercept                     | -2.602             | 1.67                  | Bootstrap           |
| mRS 1                               | 0.00149            | 0.79                  | Bootstrap           |
| mRS 2                               | -0.156             | 0.84                  | Bootstrap           |
| mRS 3                               | 2.16               | 0.90                  | Bootstrap           |
| mRS 4                               | 3.14               | 1.02                  | Bootstrap           |
| mRS 5                               | 3.33               | 1.19                  | Bootstrap           |
| age                                 | 0.05               | 0.02                  | Bootstrap           |
| male                                | -0.425             | 0.44                  | Bootstrap           |
| <b>Nursing home days at 1 year</b>  |                    |                       |                     |
| mRS 0 intercept                     | -20.65             | 11.11                 | Bootstrap           |
| mRS 1                               | -0.162             | 5.26                  | Bootstrap           |
| mRS 2                               | -0.960             | 5.55                  | Bootstrap           |
| mRS 3                               | 9.392              | 5.95                  | Bootstrap           |
| mRS 4                               | 48.55              | 6.80                  | Bootstrap           |
| mRS 5                               | 77.57              | 7.89                  | Bootstrap           |
| age                                 | 0.47               | 0.12                  | Bootstrap           |
| male                                | -6.59              | 2.93                  | Bootstrap           |
| <b>Nursing home days at 2 years</b> |                    |                       |                     |
| mRS 0 intercept                     | -59.73             | 17.83                 | Bootstrap           |
| mRS 1                               | 3.885              | 8.19                  | Bootstrap           |
| mRS 2                               | 0.713              | 8.66                  | Bootstrap           |
| mRS 3                               | 28.95              | 9.44                  | Bootstrap           |
| mRS 4                               | 94.57              | 11.17                 | Bootstrap           |
| mRS 5                               | 179.80             | 14.05                 | Bootstrap           |
| age                                 | 1.03               | 0.20                  | Bootstrap           |
| male                                | -5.368             | 4.78                  | Bootstrap           |
| <b>Nursing home days at 3 years</b> |                    |                       |                     |
| mRS 0 intercept                     | -70.76             | 19.12                 | Bootstrap           |
| mRS 1                               | 6.298              | 8.68                  | Bootstrap           |

| <b>Variable</b>                     | <b>Coefficient</b> | <b>Standard error</b> | <b>Distribution</b> |
|-------------------------------------|--------------------|-----------------------|---------------------|
| mRS 2                               | 0.698              | 9.21                  | Bootstrap           |
| mRS 3                               | 36.62              | 10.27                 | Bootstrap           |
| mRS 4                               | 90.15              | 12.03                 | Bootstrap           |
| mRS 5                               | 180.20             | 15.80                 | Bootstrap           |
| age                                 | 1.22               | 0.21                  | Bootstrap           |
| male                                | -4.938             | 5.18                  | Bootstrap           |
| <b>Nursing home days at 4 years</b> |                    |                       |                     |
| mRS 0 intercept                     | -87.83             | 21.66                 | Bootstrap           |
| mRS 1                               | 11.44              | 9.80                  | Bootstrap           |
| mRS 2                               | 6.917              | 10.41                 | Bootstrap           |
| mRS 3                               | 56.57              | 11.74                 | Bootstrap           |
| mRS 4                               | 92.17              | 13.81                 | Bootstrap           |
| mRS 5                               | 179.80             | 18.33                 | Bootstrap           |
| age                                 | 1.44               | 0.24                  | Bootstrap           |
| male                                | -4.303             | 5.89                  | Bootstrap           |
| <b>Nursing home days at 5 years</b> |                    |                       |                     |
| mRS 0 intercept                     | -94.59             | 25.28                 | Bootstrap           |
| mRS 1                               | 15.86              | 11.31                 | Bootstrap           |
| mRS 2                               | 9.896              | 12.00                 | Bootstrap           |
| mRS 3                               | 66.07              | 13.73                 | Bootstrap           |
| mRS 4                               | 91.64              | 16.20                 | Bootstrap           |
| mRS 5                               | 204.00             | 22.70                 | Bootstrap           |
| age                                 | 1.68               | 0.29                  | Bootstrap           |
| male                                | -10.33             | 6.80                  | Bootstrap           |

mRS=modified Rankin Scale

## APPENDIX II HETEROGENEITY OF KEY MODEL PARAMETERS

| Parameter                                                          | Country/s of origin*                                                                                                                                                                | Country-level heterogeneity            |
|--------------------------------------------------------------------|-------------------------------------------------------------------------------------------------------------------------------------------------------------------------------------|----------------------------------------|
| Number of eligible ischaemic stroke cases                          | Age/gender and country-specific <sup>23</sup>                                                                                                                                       | -                                      |
| Effectiveness of the intervention                                  | Global <sup>21</sup> : Australia, Austria, Canada, Denmark, France, Germany, Ireland, The Netherlands, New Zealand, South Korea, Spain, Sweden, Switzerland, USA and United Kingdom | Fixed across 32 countries              |
| 5-year mRS distribution (including death), given 3-month mRS score | United Kingdom (OXVASC <sup>27</sup> )                                                                                                                                              | Age/gender differences                 |
| Treatment protocol                                                 | Italy <sup>18</sup> and United Kingdom <sup>20</sup>                                                                                                                                | Fixed across 32 countries              |
| Medical devices and pharmaceutical unit costs for treatment        | Italy <sup>18</sup> and United Kingdom <sup>20</sup>                                                                                                                                | Fixed across 32 countries              |
| Staff performing treatment unit costs                              | Italy <sup>18</sup> and United Kingdom <sup>20</sup>                                                                                                                                | Use of country-level weighting factors |
| Utilities                                                          | United Kingdom (OXVASC <sup>27</sup> )                                                                                                                                              | Age/gender differences                 |
| Post-acute stroke health and social care resource use              | United Kingdom (OXVASC <sup>27</sup> )                                                                                                                                              | Age/gender differences                 |
| Post-acute stroke health and social care unit costs                | Country-specific <sup>30</sup>                                                                                                                                                      | -                                      |
| Days of informal care                                              | Country-specific <sup>30</sup>                                                                                                                                                      | -                                      |
| Employment rates                                                   | Country-specific <sup>31,32</sup>                                                                                                                                                   | -                                      |
| Gender-specific earnings                                           | Country-specific <sup>2,31</sup>                                                                                                                                                    | -                                      |

\*full citation in reference list of the manuscript

## APPENDIX III TREATMENT RESOURCE USE, DATA SOURCE: COST-EFFECTIVENESS

### STUDIES <sup>18,20</sup>

|                                   | Item                                     | Resource use |
|-----------------------------------|------------------------------------------|--------------|
| <b>MT</b>                         | Device                                   | 1.2          |
|                                   | Consumables                              | 1            |
|                                   | Anaesthetist                             | 4            |
|                                   | Anaesthetist assistant                   | 4            |
|                                   | Radiographer                             | 3            |
|                                   | Neuroradiologist                         | 3            |
|                                   | Registrar                                | 3            |
|                                   | Nurse                                    | 3            |
|                                   | Scrub Nurse                              | 3            |
| <b>IVT</b>                        | Drug                                     | 1            |
|                                   | Blood test                               | 1            |
|                                   | Nurse activate stroke team               | 0.08         |
|                                   | Stroke team assessment                   | 0.5          |
|                                   | Registrar accompanies patient to CT scan | 1            |
|                                   | Consultant reviews CT results and        | 0.5          |
|                                   | Nurse assessment                         | 0.08         |
|                                   | Registrar time for IV-tPA infusion       | 1.25         |
|                                   | Additional 12 routine observations       | 1            |
|                                   | 1:1 care for 5 hours with senior nurse   | 5            |
|                                   | Junior staff review                      | 0.42         |
|                                   | Overnight junior staff review            | 0.17         |
|                                   | Consultant review after infusion         | 0.33         |
| <b>Non-thrombolysis procedure</b> | Blood test                               | 1            |
|                                   | CT scan                                  | 1            |
|                                   | ER Doctor assessment                     | 0.25         |
|                                   | Nurse to accompany to CT scan            | 1            |
|                                   | Nurse assessment                         | 0.08         |
|                                   | Routine nurse observation 4 in 24 hours  | 0.33         |
|                                   | Junior staff review                      | 0.21         |
|                                   | Consultant review at 24 hours            | 0.25         |

MT=Mechanical Thrombectomy, IVT=intravenous thrombolysis

**APPENDIX IV TREATMENT COSTS IN 2017 \$: DEVICES, CONSUMABLES AND STAFF**

| Country                   | Cost of the individual procedure |            |                  | MT intervention |                 | Standard care   |                               | Eligible patients aged <80 |
|---------------------------|----------------------------------|------------|------------------|-----------------|-----------------|-----------------|-------------------------------|----------------------------|
|                           | MT                               | IVT        | Non-thrombolytic | MT+IVT (<80)    | MT alone (>=80) | IVT alone (<80) | Non-thrombolytic alone (>=80) |                            |
| Austria                   | 6,295                            | 837        | 183              | 7,315           | 6,478           | 1,020           | 183                           | 59.3%                      |
| Belgium                   | 6,203                            | 812        | 176              | 7,191           | 6,379           | 988             | 176                           | 55.1%                      |
| Bulgaria                  | 5,926                            | 738        | 155              | 6,820           | 6,081           | 893             | 155                           | 63.2%                      |
| Croatia                   | 5,848                            | 717        | 149              | 6,714           | 5,996           | 866             | 149                           | 61.9%                      |
| Cyprus                    | 5,973                            | 751        | 159              | 6,882           | 6,131           | 909             | 159                           | 56.4%                      |
| Czech Republic            | 5,861                            | 721        | 150              | 6,732           | 6,011           | 871             | 150                           | 62.5%                      |
| Denmark                   | 6,442                            | 876        | 195              | 7,513           | 6,637           | 1,071           | 195                           | 59.1%                      |
| Estonia                   | 6,162                            | 801        | 173              | 7,136           | 6,335           | 974             | 173                           | 64.5%                      |
| Finland                   | 8,817                            | 1,511      | 377              | 10,705          | 9,194           | 1,888           | 377                           | 53.2%                      |
| France                    | 6,923                            | 1,005      | 231              | 8,159           | 7,155           | 1,236           | 231                           | 49.3%                      |
| Germany                   | 6,367                            | 856        | 189              | 7,412           | 6,556           | 1,045           | 189                           | 59.2%                      |
| Greece                    | 6,137                            | 795        | 171              | 7,103           | 6,308           | 966             | 171                           | 47.4%                      |
| Hungary                   | 5,783                            | 700        | 144              | 6,627           | 5,927           | 844             | 144                           | 63.7%                      |
| Ireland                   | 6,850                            | 985        | 226              | 8,062           | 7,076           | 1,211           | 226                           | 61.4%                      |
| Italy                     | 6,451                            | 878        | 195              | 7,524           | 6,646           | 1,074           | 195                           | 45.9%                      |
| Latvia                    | 6,058                            | 773        | 165              | 6,996           | 6,223           | 939             | 165                           | 63.8%                      |
| Lithuania                 | 5,947                            | 744        | 157              | 6,848           | 6,104           | 900             | 157                           | 63.6%                      |
| Luxembourg                | 6,263                            | 828        | 181              | 7,273           | 6,444           | 1,009           | 181                           | 54.4%                      |
| Malta                     | 6,205                            | 813        | 176              | 7,194           | 6,381           | 989             | 176                           | 65.7%                      |
| The Netherlands           | 6,824                            | 978        | 224              | 8,026           | 7,047           | 1,202           | 224                           | 57.3%                      |
| Poland                    | 6,174                            | 804        | 174              | 7,152           | 6,348           | 978             | 174                           | 60.5%                      |
| Portugal                  | 6,281                            | 833        | 182              | 7,296           | 6,463           | 1,015           | 182                           | 48.7%                      |
| Romania                   | 5,840                            | 715        | 148              | 6,704           | 5,988           | 864             | 148                           | 64.0%                      |
| Slovakia                  | 5,998                            | 758        | 160              | 6,917           | 6,159           | 918             | 160                           | 68.4%                      |
| Slovenia                  | 6,034                            | 767        | 163              | 6,964           | 6,197           | 930             | 163                           | 57.6%                      |
| Spain                     | 6,795                            | 970        | 222              | 7,987           | 7,016           | 1,192           | 222                           | 49.9%                      |
| Sweden                    | 9,241                            | 1,624      | 409              | 11,274          | 9,650           | 2,033           | 409                           | 54.0%                      |
| <b>Total EU-27</b>        | <b>6,433</b>                     | <b>874</b> | <b>194</b>       | <b>7,501</b>    | <b>6,627</b>    | <b>1,068</b>    | <b>194</b>                    | <b>56.3%</b>               |
| <b>United Kingdom</b>     | <b>6,848</b>                     | <b>985</b> | <b>226</b>       | <b>8,059</b>    | <b>7,074</b>    | <b>1,210</b>    | <b>226</b>                    | <b>52.2%</b>               |
| Iceland                   | 6,883                            | 994        | 228              | 8,105           | 7,111           | 1,222           | 228                           | 57.0%                      |
| Israel                    | 6,291                            | 836        | 183              | 7,310           | 6,474           | 1,019           | 183                           | 59.0%                      |
| Norway                    | 7,005                            | 1,026      | 238              | 8,269           | 7,242           | 1,264           | 238                           | 57.1%                      |
| Switzerland               | 6,132                            | 793        | 171              | 7,096           | 6,303           | 964             | 171                           | 55.4%                      |
| <b>Total 32 countries</b> | <b>6,464</b>                     | <b>882</b> | <b>196</b>       | <b>7,543</b>    | <b>6,661</b>    | <b>1,078</b>    | <b>196</b>                    | <b>56.0%</b>               |

**APPENDIX V HEALTH AND SOCIAL RESOURCE USE COUNTRY WEIGHTS, DATA**

**SOURCE: A CROSS-NATIONAL PANEL DATA BASE<sup>30</sup>**

**Table V.1 0-90 days health care resource use country-specific weights**

| <b>0-90 days</b>       | <b>Length of stay</b> | <b>Day cases</b> | <b>Outpatient</b> | <b>A &amp; E</b> | <b>Nursing home</b> |
|------------------------|-----------------------|------------------|-------------------|------------------|---------------------|
| <b>Austria</b>         | 1.08                  | 4.16             | 3.11              | 1.65             | 0.91                |
| <b>Belgium</b>         | 0.80                  | 1.31             | 0.88              | 0.53             | 4.07                |
| <b>Bulgaria</b>        | 0.29                  | NA               | 0.62              | 0.36             | 0.57                |
| <b>Croatia</b>         | 0.66                  | 2.88             | 1.10              | 0.41             | 0.21                |
| <b>Cyprus</b>          | 0.51                  | 0.30             | 4.93              | 4.85             | 0.45                |
| <b>Czech Republic</b>  | 1.24                  | 0.04             | 4.72              | 0.23             | 0.91                |
| <b>Denmark</b>         | 0.31                  | 2.09             | 0.64              | 0.64             | 1.20                |
| <b>Estonia</b>         | 0.83                  | 0.56             | 2.32              | 1.81             | 0.55                |
| <b>Finland</b>         | 1.15                  | 0.95             | 0.84              | 0.70             | 0.87                |
| <b>France</b>          | 0.56                  | 0.49             | 0.77              | 1.38             | 1.41                |
| <b>Germany</b>         | 0.92                  | 1.03             | 2.71              | 0.20             | 0.68                |
| <b>Greece</b>          | 0.52                  | NA               | 0.28              | 1.55             | 0.53                |
| <b>Hungary</b>         | 0.79                  | NA               | 5.97              | 0.28             | 0.53                |
| <b>Iceland</b>         | 0.89                  | NA               | 2.89              | 1.20             | 1.32                |
| <b>Ireland</b>         | 0.93                  | 0.26             | 0.88              | 2.02             | 0.41                |
| <b>Israel</b>          | 0.62                  | 0.02             | 2.31              | 3.01             | 0.45                |
| <b>Italy</b>           | 0.81                  | 1.07             | 1.60              | 1.40             | 0.61                |
| <b>Latvia</b>          | 0.57                  | 4.46             | 0.79              | 0.54             | 0.52                |
| <b>Lithuania</b>       | 0.64                  | 0.04             | 1.66              | 0.69             | 1.16                |
| <b>Luxembourg</b>      | 0.89                  | 0.71             | 2.25              | 0.92             | 2.08                |
| <b>Malta</b>           | 1.27                  | 0.09             | 0.67              | 0.99             | 0.36                |
| <b>The Netherlands</b> | 0.49                  | 1.11             | 1.68              | 0.40             | 0.76                |
| <b>Norway</b>          | 0.63                  | 4.11             | 0.96              | 0.84             | 1.06                |
| <b>Poland</b>          | 0.60                  | 0.46             | 1.82              | 0.70             | 0.25                |
| <b>Portugal</b>        | 0.69                  | 0.16             | 1.23              | 3.27             | 0.44                |
| <b>Romania</b>         | 0.48                  | 6.07             | 2.36              | 0.14             | 0.86                |
| <b>Slovakia</b>        | 0.58                  | NA               | 5.99              | 1.12             | 0.66                |
| <b>Slovenia</b>        | 0.85                  | 0.14             | 1.35              | 0.71             | 0.62                |
| <b>Spain</b>           | 0.52                  | 0.61             | 1.23              | 2.37             | 0.46                |
| <b>Sweden</b>          | 0.55                  | 0.98             | 1.07              | 1.14             | 1.12                |
| <b>Switzerland</b>     | 0.88                  | NA               | 0.51              | 0.55             | 1.74                |

A&E= accidents and emergency; NA= not available, assumed to be equal to the average



**Table V.2 1-5 years health care resource use country-specific weights**

| <b>1 to 5 years</b>    | <b>Length of stay</b> | <b>Day cases</b> | <b>Outpatient</b> | <b>A &amp; E</b> | <b>Nursing home</b> |
|------------------------|-----------------------|------------------|-------------------|------------------|---------------------|
| <b>Austria</b>         | 2.40                  | 0.45             | 2.40              | 0.96             | 1.51                |
| <b>Belgium</b>         | 1.18                  | 1.04             | 1.24              | 0.53             | 2.37                |
| <b>Bulgaria</b>        | 1.92                  | NA               | 0.85              | 0.35             | 0.33                |
| <b>Croatia</b>         | 1.70                  | 0.92             | 1.68              | 0.50             | 0.74                |
| <b>Cyprus</b>          | 0.53                  | 0.11             | 4.31              | 2.93             | 0.77                |
| <b>Czech Republic</b>  | 2.12                  | 0.04             | 5.24              | 0.20             | 0.52                |
| <b>Denmark</b>         | 0.91                  | 0.37             | 0.71              | 0.55             | 1.04                |
| <b>Estonia</b>         | 1.37                  | 0.58             | 2.45              | 1.24             | 1.46                |
| <b>Finland</b>         | 1.66                  | 0.31             | 1.04              | 0.54             | 1.34                |
| <b>France</b>          | 1.00                  | 1.47             | 0.95              | 0.68             | 1.14                |
| <b>Germany</b>         | 2.63                  | 0.04             | 3.35              | 0.20             | 1.19                |
| <b>Greece</b>          | 1.65                  | NA               | 0.38              | 1.08             | 0.21                |
| <b>Hungary</b>         | 2.24                  | 0.13             | 4.19              | 0.20             | 0.89                |
| <b>Iceland</b>         | NA                    | NA               | NA                | NA               | NA                  |
| <b>Ireland</b>         | 0.89                  | 1.35             | 0.89              | 0.95             | 0.88                |
| <b>Israel</b>          | NA                    | NA               | NA                | NA               | NA                  |
| <b>Italy</b>           | 1.04                  | 0.20             | 1.28              | 0.91             | 0.67                |
| <b>Latvia</b>          | 1.54                  | 0.46             | 1.13              | 0.56             | 0.84                |
| <b>Lithuania</b>       | 2.06                  | 0.13             | 1.90              | 0.59             | 3.36                |
| <b>Luxembourg</b>      | 1.34                  | 0.50             | 3.26              | 0.53             | 1.44                |
| <b>Malta</b>           | 1.41                  | 0.49             | 0.71              | 0.69             | 0.50                |
| <b>The Netherlands</b> | 0.70                  | 0.83             | 2.02              | 0.30             | 1.24                |
| <b>Norway</b>          | NA                    | NA               | NA                | NA               | NA                  |
| <b>Poland</b>          | 1.31                  | 0.27             | 1.93              | 0.50             | 0.41                |
| <b>Portugal</b>        | 0.73                  | 0.50             | 1.21              | 1.84             | 0.37                |
| <b>Romania</b>         | 1.82                  | 0.80             | 2.53              | 0.12             | 1.58                |
| <b>Slovakia</b>        | 1.64                  | 0.00             | 4.83              | 0.67             | 1.22                |
| <b>Slovenia</b>        | 1.42                  | 0.11             | 1.46              | 0.50             | 1.36                |
| <b>Spain</b>           | 0.79                  | 0.49             | 1.37              | 1.58             | 0.58                |
| <b>Sweden</b>          | 0.92                  | 0.08             | 0.85              | 0.63             | 1.25                |
| <b>Switzerland</b>     | NA                    | NA               | NA                | NA               | NA                  |

A&E= accidents and emergency; NA= not available, assumed to be equal to the average

**APPENDIX VI TOTAL 5-YEAR COSTS AFTER MT AND STANDARD CARE IN 2017 \$ MILLION.**

|                       | Mechanical thrombectomy |               |                     |                | Standard care          |               |                     |                | Health & social care costs | Societal costs       |
|-----------------------|-------------------------|---------------|---------------------|----------------|------------------------|---------------|---------------------|----------------|----------------------------|----------------------|
|                       | Health and social care  | Informal care | Productivity losses | Societal costs | Health and social care | Informal care | Productivity losses | Societal costs | MT vs SC (95% UI)          | MT vs SC (95% UI)    |
| <b>Austria</b>        | 283                     | 16            | 14                  | 313            | 321                    | 29            | 18                  | 368            | -38 (-78 to 20)            | -55 (-94 to 14)      |
| <b>Belgium</b>        | 290                     | 13            | 13                  | 316            | 330                    | 24            | 17                  | 371            | -40 (-80 to 25)            | -55 (-96 to 13)      |
| <b>Bulgaria</b>       | 83                      | 5             | 3                   | 91             | 46                     | 9             | 4                   | 59             | 37 (32 to 43)              | 32 (27 to 41)        |
| <b>Croatia</b>        | 54                      | 6             | 2                   | 62             | 35                     | 11            | 3                   | 49             | 19 (15 to 24)              | 13 (8 to 21)         |
| <b>Cyprus</b>         | 4                       | 1             | 0                   | 5              | 3                      | 1             | 1                   | 5              | 0.8 (0.4 to 1.4)           | 0.2 (-0.4 to 1.2)    |
| <b>Czech Republic</b> | 189                     | 16            | 8                   | 214            | 176                    | 29            | 11                  | 215            | 14 (-2.2 to 35)            | -1.5 (-21 to 31)     |
| <b>Denmark</b>        | 153                     | 9             | 10                  | 171            | 174                    | 16            | 13                  | 203            | -22 (-41 to 12)            | -32 (-57 to 6)       |
| <b>Estonia</b>        | 21                      | 1             | 1                   | 24             | 19                     | 2             | 2                   | 23             | 2 (0.03 to 5)              | 0.9 (-1.3 to 4)      |
| <b>Finland</b>        | 264                     | 4             | 8                   | 277            | 298                    | 7             | 11                  | 316            | -34 (-76 to 27)            | -40 (-81 to 17)      |
| <b>France</b>         | 916                     | 50            | 48                  | 1,013          | 944                    | 95            | 62                  | 1,101          | -28 (-145 to 185)          | -88 (-225 to 144)    |
| <b>Germany</b>        | 3,746                   | 145           | 182                 | 4,072          | 4,237                  | 261           | 239                 | 4,738          | -492 (-961 to 259)         | -665 (-1,175 to 118) |
| <b>Greece</b>         | 178                     | 11            | 4                   | 193            | 173                    | 21            | 6                   | 200            | 5 (-18 to 38)              | -7 (-34 to 32)       |
| <b>Hungary</b>        | 173                     | 8             | 6                   | 187            | 156                    | 14            | 8                   | 178            | 18 (1.2 to 44)             | 10 (-9 to 40)        |
| <b>Ireland</b>        | 51                      | 5             | 5                   | 61             | 54                     | 9             | 7                   | 70             | -3 (-9 to 6)               | -9 (-17 to 2)        |
| <b>Italy</b>          | 1,148                   | 79            | 37                  | 1,265          | 1,215                  | 157           | 50                  | 1,422          | -67 (-233 to 173)          | -158 (-345 to 161)   |
| <b>Latvia</b>         | 31                      | 3             | 2                   | 36             | 18                     | 5             | 3                   | 26             | 12 (11 to 15)              | 9 (7 to 14)          |
| <b>Lithuania</b>      | 52                      | 3             | 3                   | 58             | 40                     | 6             | 4                   | 50             | 11 (7 to 18)               | 8 (3 to 17)          |

|                           | Mechanical thrombectomy |               |                     |                | Standard care          |               |                     |                | Health & social care costs | Societal costs           |
|---------------------------|-------------------------|---------------|---------------------|----------------|------------------------|---------------|---------------------|----------------|----------------------------|--------------------------|
|                           | Health and social care  | Informal care | Productivity losses | Societal costs | Health and social care | Informal care | Productivity losses | Societal costs | MT vs SC (95% UI)          | MT vs SC (95% UI)        |
| <b>Luxembourg</b>         | 16                      | 1             | 1                   | 17             | 19                     | 1             | 1                   | 21             | -3 (-5 to 1)               | -4 (-6 to 0.5)           |
| <b>Malta</b>              | 5                       | 0             | 0                   | 5              | 5                      | 0             | 0                   | 6              | -0.2 (-0.7 to 0.5)         | -0.5 (-1 to 0.4)         |
| <b>The Netherlands</b>    | 397                     | 10            | 22                  | 430            | 452                    | 19            | 30                  | 500            | -55 (-129 to 41)           | -71 (-129 to 25)         |
| <b>Poland</b>             | 481                     | 21            | 18                  | 520            | 397                    | 37            | 24                  | 459            | 84 (37 to 157)             | 61 (7 to 144)            |
| <b>Portugal</b>           | 77                      | 6             | 4                   | 86             | 58                     | 11            | 5                   | 74             | 19 (13 to 28)              | 12 (4 to 26)             |
| <b>Romania</b>            | 267                     | 20            | 9                   | 296            | 183                    | 34            | 12                  | 229            | 84 (65 to 114)             | 66 (42 to 107)           |
| <b>Slovakia</b>           | 81                      | 5             | 4                   | 90             | 68                     | 9             | 5                   | 83             | 13 (6 to 23)               | 8 (0.3 to 19)            |
| <b>Slovenia</b>           | 35                      | 2             | 1                   | 39             | 35                     | 4             | 2                   | 41             | -0.1 (-4 to 6)             | -2 (-7 to 6)             |
| <b>Spain</b>              | 547                     | 55            | 29                  | 631            | 532                    | 104           | 38                  | 674            | 16 (-51 to 115)            | -43 (-118 to 95)         |
| <b>Sweden</b>             | 300                     | 6             | 17                  | 322            | 327                    | 11            | 22                  | 361            | -28 (-75 to 45)            | -38 (-80 to 30)          |
| <b>Total EU-27</b>        | 10,958                  | 554           | 467                 | 11,979         | 11,735                 | 1,015         | 618                 | 13,369         | -778 (-2,183 to 1,453)     | -1,390 (-2,938 to 1,095) |
| <b>Iceland</b>            | 8                       | 0.2           | 1                   | 9              | 10                     | 0.3           | 1                   | 11             | -1.4 (-3 to 0.5)           | -2 (-3 to 0.2)           |
| <b>Israel</b>             | 32                      | 6             | 5                   | 44             | 27                     | 11            | 7                   | 45             | 6 (3 to 10)                | -1 (-6 to 7)             |
| <b>Norway</b>             | 232                     | 4             | 11                  | 247            | 276                    | 7             | 14                  | 297            | -44 (-85 to 11)            | -50 (-86 to 14)          |
| <b>Switzerland</b>        | 352                     | 13            | 19                  | 384            | 421                    | 24            | 25                  | 470            | -69 (-129 to 13)           | -86 (-144 to 7)          |
| <b>United Kingdom</b>     | 1,037                   | 54            | 63                  | 1,154          | 1,128                  | 100           | 84                  | 1,313          | -91 (-215 to 118)          | -160 (-327 to 101)       |
| <b>Total 32 countries</b> | 12,595                  | 634           | 570                 | 13,800         | 13,576                 | 1,164         | 756                 | 15,496         | -981 (-2,564 to 1,544)     | -1,696 (-3,603 to 1,226) |

Note: due to rounding the columns may not add up to the total values

## APPENDIX VII ONE-WAY SENSITIVITY ANALYSES

| Model assumption                                           | Societal perspective |                |               | Health & Social Care perspective |                |               |
|------------------------------------------------------------|----------------------|----------------|---------------|----------------------------------|----------------|---------------|
|                                                            | ICER                 | NICE threshold | GDP threshold | ICER                             | NICE threshold | GDP threshold |
|                                                            |                      | Probability    | Probability   |                                  | Probability    | Probability   |
| <b>Base case</b>                                           | MT dominates         | 100%           | 100%          | MT dominates                     | 100%           | 100%          |
| <b>Lower bound UI from Goyal et al. 2016 meta-analysis</b> | MT dominates         | 92%            | 96.8%         | MT dominates                     | 88.7%          | 96.5%         |
| <b>Upper bound UI from Goyal et al. 2016 meta-analysis</b> | MT dominates         | 100%           | 100%          | MT dominates                     | 100%           | 100%          |
| <b>Using effectiveness from MR CLEAN*</b>                  | MT dominates         | 100%           | 100%          | MT dominates                     | 100%           | 100%          |
| <b>Using effectiveness from RESCAVAT trial*</b>            | MT dominates         | 100%           | 100%          | MT dominates                     | 100%           | 100%          |
| <b>Using effectiveness from EXTEND-IA trial*</b>           | MT dominates         | 100%           | 100%          | MT dominates                     | 100%           | 100%          |
| <b>Using effectiveness from ESCAPE trial*</b>              | MT dominates         | 100%           | 100%          | MT dominates                     | 100%           | 100%          |
| <b>Varying treatment cost +20%</b>                         | MT dominates         | 100%           | 100%          | MT dominates                     | 100%           | 100%          |
| <b>Varying treatment cost -20%</b>                         | MT dominates         | 100%           | 100%          | MT dominates                     | 100%           | 100%          |
| <b>Varying survival post-stroke +20%</b>                   | MT dominates         | 100%           | 100%          | MT dominates                     | 100%           | 100%          |
| <b>Varying survival post-stroke -20%</b>                   | MT dominates         | 100%           | 100%          | MT dominates                     | 100%           | 100%          |
| <b>Varying all health utilities +20%</b>                   | MT dominates         | 100%           | 100%          | MT dominates                     | 100%           | 100%          |
| <b>Varying all health utilities -20%</b>                   | MT dominates         | 100%           | 100%          | MT dominates                     | 100%           | 100%          |
| <b>Varying all health care costs +20%</b>                  | MT dominates         | 100%           | 100%          | MT dominates                     | 100%           | 100%          |
| <b>Varying all health care costs -20%</b>                  | MT dominates         | 100%           | 100%          | MT dominates                     | 100%           | 100%          |
| <b>Excluding all health care costs</b>                     | MT dominates         | 100%           | 100%          | € 4,260                          | 100%           | 100%          |
| <b>Varying all social care costs +20%</b>                  | MT dominates         | 100%           | 100%          | MT dominates                     | 100%           | 100%          |
| <b>Varying all social care costs -20%</b>                  | MT dominates         | 100%           | 100%          | MT dominates                     | 100%           | 100%          |
| <b>Excluding all social care costs</b>                     | MT dominates         | 100%           | 100%          | € 2,280                          | 100%           | 100%          |
| <b>No mRS3 patient receives informal care</b>              | MT dominates         | 100%           | 100%          | MT dominates                     | 100%           | 100%          |
| <b>All mRS3 patients receive informal care</b>             | MT dominates         | 100%           | 100%          | MT dominates                     | 100%           | 100%          |
| <b>Varying days of informal care received +20%</b>         | MT dominates         | 100%           | 100%          | MT dominates                     | 100%           | 100%          |
| <b>Varying days of informal care received -20%</b>         | MT dominates         | 100%           | 100%          | MT dominates                     | 100%           | 100%          |

Note: ICER=Incremental Cost-Effectiveness Ratio, GDP=Gross Domestic Product, €31,592, NICE=National Institute of Health and Care Excellence, €22,727; mRS= modified Rankin Scale, UI=95% Uncertainty Intervals. \*Only 4 of the 5 trials included in the meta-analysis by Goyal et al., 2016 could be used. Evidence from the Swift Prime trial could not as the published results did not match the structure of the decision-analytic model (i.e. mRS5 and mRS6 estimates combined)
